# Supplementary material for: The association between common mental disorders, socioeconomic outcomes and social mobility: A systematic review
Source: Research Square preprint supplement (doi:10.21203/rs.3.rs-2656092/v1), 2024-01-11
Supplement: Supplementary file 2 [file 7c79e547e5b1318d9b4ed56c.docx]

*The association between common mental disorders, socioeconomic outcomes and social mobility: A systematic review*

*Social Psychiatry and Psychiatric Epidemiology*

*Iyinoluwa Oshinowo, Phoebe Barnett, Christopher Cooper, Shubulade Smith2, Clare Taylor, Stephen Pilling,*

*Corresponding author:*

*Iyinoluwa Oshinowo*

[*i.oshinowo@ucl.ac.uk*](mailto:i.oshinowo@ucl.ac.uk)

*Centre for Outcomes Research and Effectiveness, Research Department of Clinical, Educational and Health Psychology, University College London, London, UK*

**Online resource 1: Protocol**

**Research question**

**What is the impact of anxiety and depressive disorders on social mobility?**

The research question was developed during a scoping meeting with Brian Corbett from the SMC, the NCCMH project team and members of the expert reference group. The membership of the project team and expert reference group is set out in Appendix A1.

**Methods**

The review will be carried out according to the methodological guidance set out in the Centre for Reviews and Dissemination’s handbook (1).

*Searching*

Study identification (literature searching) will use database and non-database methods of study identification (2).

Bibliographic

The following electronic databases will be searched:

- Ovid MEDLINE(R) and Epub Ahead of Print, In-Process & Other Non-Indexed Citations and Daily*
- Embase 1974 to 2019 September 24*
- HMIC Health Management Information Consortium 1979 to May 2019*
- PsycINFO 1806 to September Week 2 2019*
- Social Policy and Practice 201907*
- Applied Social Sciences Index & Abstracts (ASSIA)**
- Social Science Database**
- ERIC***

* searched via Ovid; ** searched via ProQuest; *** searched via EBSCOHost.

The bibliographic search strategy will take the following form:

((search terms for social mobility) AND (search terms for mental health) and (studies reporting RCT or Cohort/longitudinal study designs))

The following study deign literature search filters will be used: the CADATH RCT/CCT filter (3) and the SIGN filter (4). The SIGN filter was adapted to focus on studies reporting cohort or longitudinal designs.

The search strategy will be reviewed using the PRESS Checklist (5). The primary search strategy is reported in appendix two using a search narrative to explain the contextual and conceptual detail behind the selection of search terms (6).

The following non-database search methods will be undertaken to identify published and unpublished studies:

- Systematic reviews meeting inclusion will be checked and their included studies cross-checked for any studies that might meet our inclusion criteria but which have not been identified by our bibliographic searches.
- Web-searching will be undertaken by one researcher using the Google advanced interface. The search strategies will be based on the bibliographic search strategy set out in Annex 2 with syntax and format modified for the Google interface. The guidance of Briscoe will be used to report web-searches (7).
- The list of all studies meeting inclusion will be shared with the rest of the project team and expert reference group.

*Limits*

The searches will not be limited by date or language of publication. The searches will be limited by study design to: studies reporting trials (e.g. RCT) or cohort studies. Systematic reviews will not be included but any identified will be retained for scrutiny of their included studies (see above).

**Screening**

All studies will be double screened at title/abstract and full-text by three researchers using Rayyan software (8). The title/abstract screening is initially broader in scope than is necessary to address this research question specifically. The searches and title/abstract screening are being used to address a second research question and separate review.

The following inclusion criteria will be applied at title/abstract:

Study reports:

1. An RCT OR Cohort study OR Systematic review; and
2. Population has a mental disorder; and
3. Social mobility is an outcome of the study.

Criteria 2 and 3 will be interpreted broadly with any recognised mental disorder or possible description of social mobility being sufficient for a study to be included for further screening at full-text.

The following inclusion criteria will be applied at full-text:

Study reports:

1. Cohort study OR Systematic review; and
2. Population has a mental disorder; and
3. Social mobility is an outcome of the study; and
4. Population has a diagnosed anxiety OR depressive disorder.

Criteria 1 and 4 are intended to focus study selection at full-text to align with the research question of this review specifically. The decision to include cohort studies was taken by the expert reference group.

**Quality appraisal**

Quality appraisal will be undertaken by one reviewer and checked in detail by another. The Newcastle-Ottawa tool will be used (9).

**Data extraction**

The following data will be extracted by one reviewer and checked in detail by another.

Descriptive data

Study ref

- Selection/eligibility criteria for cohort
- Cohort/sample size
- Age: mean sample age
- Gender: % of sample of who are female
- Ethnicity: % of each ethnicity recorded
- Diagnosis (inc. diagnostic criteria used)
- Specific disorder + formal diagnosis (y/n) and criteria used

Outcome data for synthesis

- Comparator or intervention/ exposure
- Occupational Change (Method of measurement and assessment will be extracted)
- Change in income or socioeconomic status (Method of measurement and assessment will be extracted)
- Severity of illness
- Events or sum. measures over-time
- Adjusted = if yes, how
- Data collection points and follow-up
- Potential confounders/modifiers
- Ref to missing data or loss to follow-up
- Country
- Region
- Setting

General data

- Limitations as identified by study authors
- Funding
- Link to other work (protocol or other studies)

**Data synthesis**

Data will be synthesised narratively by mental disorder (e.g., anxiety or depressive disorder) and then sub-categorised by identified social mobility outcomes. Similar outcomes will be grouped and differences between study outcomes explained narratively. Study characteristics will be reported in three tables aligned to the subheadings set out above in data-extraction.

If sufficiently homogenous and high-quality data are located, random-effects meta-analysis may be considered, although this is unlikely. A minimum number of five studies reporting unadjusted data and the same social mobility outcome measures will be used as initial guide.

**Review team**

Phoebe Barnett

Chris Cooper

Iyinoluwa Oshinowo

Stephen Pilling

**A1.1 Appendix**

**Project team - NCCMH**

The project team is led by:

**Shubulade Smith**, Clinical Director, NCCMH

**Stephen Pilling**, Academic Director, NCCMH

The team includes:

**Phoebe Barnett**, Researcher

**Chris Cooper**, Systematic Reviewer

**Maryla Moulin**, Head of Programme Management and Operations

**Iyinoluwa Oshinowo**, Researcher

**Joanna Popis**, Project Manager

**Clare Taylor**, Head of Quality and Research Development

**Victoria Turner**, Researcher

Expert reference group:

**Stella Branthonne-Foster**, National Expert-by-Experience Advisor to the NCCMH

**Jacqui Dyer**, Chair of the Black Thrive Steering Committee

**Peter Fonagy**, Head of the Division of Psychology and Language Sciences, UCL; Chief Executive of the Anna Freud National Centre for Children and Families

**Alissa Goodman**, Economist at the Institute of Education, UCL

**James Kirkbride**, Reader in Epidemiology in the Division of Psychiatry, UCL

**Praveetha Patalay**, Associate Professor across the MRC Unit for Lifelong Health and Ageing and the Centre for Longitudinal Studies at UCL

**Jean-Baptiste Pingault**, Associate Professor, Department of Clinical, Educational and Health Psychology, UCL

**Harri Weeks**, Stakeholder Engagement Manager for the National LGB&T Partnership

**A1.2 Appendix**

The MEDLINE search strategy

**Database:** Ovid MEDLINE(R) and Epub Ahead of Print, In-Process & Other Non-Indexed Citations and Daily

**Host:** OVID

**Search parameters:** 1946 to 3 October 2019

**Date of search:** 4 October 2019

**Search checked by:** Phoebe Barnett and Iyinoluwa Oshinowo.

**Conceptual narrative:** The purpose of this literature search is to identify studies that examine the impact of mental disorders on social mobility. The units of analysis will be: i) studies reporting randomised controlled trials (RCTs), to examine access to treatment (or interventions) by social class, and; ii) cohort studies, to examine the impact of mental disorders on social mobility over time. The decision to focus on these particular study designs was taken by the expert reference group.

Below, a contextual narrative is set out to describe the structure and technical detail of the literature search, as well as to explain the decision-making process of the literature search for MEDLINE (6).

| Search strategy | Contextual narrative |
| --- | --- |
| 1 Social Mobility/ (961)  2 (Social$ adj3 (mobil$ or change)).ti,ab,kw. (7080)  3 ((absolute or relative or "long range" or "short range") adj3 mobil$).ti,ab,kw. (1785)  4 exp Socioeconomic Factors/ and mobil$.ti,ab,kw. (5725)  5 *Economic Status/ and (mobil$ or change).ti,ab,kw. (6)  6 ((socioeconomic or socio-economic or economic$ or income or salary or salaries or earn or earning or wealth or  occupation or employment or job) adj3 (mobil$ or change or stratification)).ti,ab,kw. (3309)  7 ((intergenerational or inter-generational Intragenerational or Intra-generational) adj2 (mobil$ or  change)).ti,ab,kw. (209)  8 ((low or medium or high) adj3 depriv$).ti,ab,kw. (1697)  9 ((father* or mother* or parent* or grandfather* or grandmother* or early-life) adj3 (occupation* or employment* or  job or education or upbringing)).ti,ab,kw. (15425)  10 *Social class/ (12835)  11 ((social class or social background or social status or social standing or social selection or social determinism  or social classification or socioeconomic classification) adj3 (mobil$ or change)).ti,ab,kw. (144)  12 (((poor or disadvantage$) adj3 (background or mobil$)) or "standard of living").ti,ab,kw. (4474)  13 *Education/ and mobil$.ti,ab,kw. (139)  14 ((education* and (attainment or performance or results or outcome$ or grade$)) adj3 mobil$).ti,ab,kw. (2106)  15 1 or 2 or 3 or 4 or 5 or 6 or 7 or 8 or 9 or 10 or 11 or 12 or 13 or 14 (51357) | Lines 1-14 set out the search terms for social mobility. The search terms are reported by line number (and as run, per Cochrane guidance (10)), with the corresponding number of studies identified per line reported in parentheses.  Lines 1, 4, 5 and 13 represent controlled indexing terminology (identified by the use of /).  Line 5, 10 and 13 represent focused indexing terms (identified by the *) which means only studies in which the indexing term is the central topic of the paper will be retrieved.  Lines 5 and 13 are further focused by free-text search terms, meaning that the search line searches first for the indexing term and then within this, any study using the term mobil* at title, abstract or keyword.  The remaining lines represent free-text search terms. Free-text terminology was identified in scoping, a review of the search terms used in potentially relevant systematic reviews and their included studies, and with reference to our project reference group (c.f. (11-20)). All the searching is undertaken on the title (ti), abstract (ab) and author generated keyword (kw) fields.  The free-text lines use proximity searching, indicated by adj3. This means that the term social* will be searched within two words of the term mobil*, allowing for other words which may appear between these two words, and in any order.  Truncation is used indicated by the $ sign. Truncation captures alternative spellings or word-endings, such as social$ for socially and mobil$ for mobile or mobility.  Line 15 combines all of the search terms using the Boolean connector OR. This means that all of the search terms set out in lines 1-14 will be searched for. |
| 16 exp Mental Disorders/ (1193721)  17 (mental$ adj3 (health$ or ill$ or unwell or disorder$)).ti,ab,kw. (189969)  18 16 or 17 (1288150) | Line 16 represents controlled indexing for mental disorders. The term is employed to capture relevant sub-headings (represented by exp). In this case, the sub-headings relate to mental disorders such as anxiety or depressive disorders.  Line 17 represents high-level terms for mental health terminology. Given the unit of analysis for this reviews, and the resources available, this is a pragmatic decision to control the volume of studies identified (10). A form of sensitivity analysis has been undertaken to examine the effect of this decision and recall was unaffected based on the marker papers identified from scoping searches. |
| 19 (Randomized Controlled Trial or Controlled Clinical Trial or Pragmatic Clinical Trial or Equivalence Trial or  Clinical Trial, Phase III).pt. (582068)  20 Randomized Controlled Trial/ (490662)  21 exp Randomized Controlled Trials as Topic/ (129469)  22 "Randomized Controlled Trial (topic)"/ (0)  23 Controlled Clinical Trial/ (93279)  24 exp Controlled Clinical Trials as Topic/ (134583)  25 "Controlled Clinical Trial (topic)"/ (0)  26 Randomization/ (100589)  27 Random Allocation/ (100589)  28 Double-Blind Method/ (153596)  29 Double Blind Procedure/ (0)  30 Double-Blind Studies/ (153596)  31 Single-Blind Method/ (27393)  32 Single Blind Procedure/ (0)  33 Single-Blind Studies/ (27393)  34 Placebos/ (34482)  35 Placebo/ (0)  36 Control Group/ (1631)  37 (random* or sham or placebo*).ti,ab,hw,kf,kw. (1425255)  38 ((singl* or doubl*) adj (blind* or dumm* or mask*)).ti,ab,hw,kf,kw. (228220)  39 ((tripl* or trebl*) adj (blind* or dumm* or mask*)).ti,ab,hw,kf,kw. (906)  40 (control* adj3 (study or studies or trial* or group*)).ti,ab,kf,kw. (929014)  41 (Nonrandom* or non random* or non-random* or quasi-random* or quasirandom*).ti,ab,hw,kf,kw. (41481)  42 allocated.ti,ab,hw. (61788)  43 ((open label or open-label) adj5 (study or studies or trial*)).ti,ab,hw,kf,kw. (32438)  44 ((equivalence or superiority or non-inferiority or noninferiority) adj3 (study or studies or  trial*)).ti,ab,hw,kf,kw. (7383)  45 (pragmatic study or pragmatic studies).ti,ab,hw,kf,kw. (362)  46 ((pragmatic or practical) adj3 trial*).ti,ab,hw,kf,kw. (4400)  47 ((quasiexperimental or quasi-experimental) adj3 (study or studies or trial*)).ti,ab,hw,kf,kw. (6934)  48 (phase adj3 (III or "3") adj3 (study or studies or trial*)).ti,hw,kf,kw. (26282)  49 or/19-48 (2052554) | Lines 19-48 are search terms for controlled trials. The search filter used here is the Canadian Agency for Drugs and Technologies in Health (CADTH) April 2018 controlled trials filter (21). The filter has been amended at line 48 to incorporate the P3 search filter (22). The P3 filter improves the sensitivity of searches for controlled trials. |
| 50 exp cohort studies/ (1904669)  51 (cohort adj (study or studies)).tw. (185011)  52 Cohort analy$.tw. (7266)  53 (Follow up adj (study or studies)).tw. (47569)  54 (observational adj (study or studies)).tw. (96492)  55 Longitudinal.tw. (228754)  56 Retrospective.tw. (488119)  57 50 or 51 or 52 or 53 or 54 or 55 or 56 (2275158) | Lines 50-56 are search terms for cohort studies (and potential synonyms) which are taken from the Scottish Intercollegiate Guidelines Network (SIGN) observational search filter (23). |
| 58 (systematic adj3 review$).ti,ab,kw. (159098) | Line 58 is a pragmatic search for systematic reviews. |
| 59 49 or 57 or 58 (4039720) | Line 59 combines the search filter for controlled trials (line 49) OR the search filter for cohort studies (line 57) OR systematic reviews. |
| 60 15 and 18 and 59 (2268) | Line 60 completes the literature search, combining line 15 (terms for social mobility) AND (terms for mental disorders) AND (terms for controlled trials OR cohort studies OR systematic reviews)  No language or date limits are applied to the search strategy. |

**References**

1. Centre for Reviews and Dissemination. Systematic reviews – CRD’s guidance for undertaking reviews in healthcare. York: Centre for Reviews and Dissemination, University of York; 2009. Available from: <https://www.york.ac.uk/media/crd/Systematic_Reviews.pdf>.

2. Cooper C, Booth A, Varley-Campbell J, Britten N, Garside R. Defining the process to literature searching in systematic reviews: a literature review of guidance and supporting studies. BMC Medical Research Methodology. 2018;18(1):85.

3. Cadth. CADTH: Resources 2018 [Available from: <https://www.cadth.ca/resources>.

4. Network SIG. SIGN Strategy (Ovid) [Available from: <http://www.sign.ac.uk/assets/search-filters-observational-studies.docx>.

5. McGowan J, Sampson M, Salzwedel DM, Cogo E, Foerster V, Lefebvre C. PRESS Peer Review of Electronic Search Strategies: 2015 Guideline Statement. Journal of clinical epidemiology. 2016;75:40-6.

6. Cooper C, Dawson S, Peters J, Varley-Campbell J, Cockcroft E, Hendon J, et al. Revisiting the need for a literature search narrative: A brief methodological note. Research synthesis methods. 2018.

7. Briscoe S. Web searching for systematic reviews: a case study of reporting standards in the UK Health Technology Assessment programme. BMC research notes. 2015;8:153.

8. Mourad O, Hossam H, Zbys F, Elmagarmid A. Rayyan — a web and mobile app for systematic reviews. Systematic Reviews. 2016;5(210).

9. GA Wells BS, D O'Connell, J Peterson, V Welch, M Losos, P Tugwell,,. The Newcastle-Ottawa Scale (NOS) for assessing the quality of nonrandomised studies in meta-analyses, 2019 [Available from: <http://www.ohri.ca/programs/clinical_epidemiology/oxford.asp>.

10. Lefebvre C, Manheimer E, Glanville J. Chapter 6: Searching for studies. 2011 [cited Accessed 7th December 2017]. In: Cochrane Handbook for Systematic Reviews of Interventions [Internet]. The Cochrane Collaboration, [cited Accessed 7th December 2017]. Available from: <http://handbook.cochrane.org/>.

11. DRAFT REPORT ON FOSTERING SOCIAL MOBILITY AS A CONTRIBUTION TO SOCIAL COHESION,. Strasbourg: EUROPEAN COMMITTEE OF SOCIAL COHESION (CDCS),; 2011.

12. Social mobility indicators Gov.Uk: The Deputy Prime Minister’s Office; 2015 [Available from: <https://www.gov.uk/government/publications/social-mobility-indicators/social-mobility-indicators>.

13. Department for business invovation and skils. Social Mobility: A literature review. London: Department for business invovation and skils,; 2011.

14. Elhakeem A, Hardy R, Bann D, Caleyachetty R, Cosco TD, Hayhoe RP, et al. Intergenerational social mobility and leisure-time physical activity in adulthood: a systematic review. Journal of Epidemiology and Community Health. 2017;71(7):673-80.

15. Group BC. THE STATE OF SOCIAL MOBILITY IN THE UK. UK: Sutton Trust; 2017.

16. Motta JVdS, Lima NP, Olinto MTA, Gigante DP. Social mobility and smoking: a systematic review. Ciência & Saúde Coletiva. 2015;20:1515-20.

17. Torche F. How do we characteristically measure and analyze intergenerational mobility? 2013.

18. de Quadros Lde C, Laura HC, Quevedo Lde A, Gigante DP. [Effects of social mobility on adult mental health:a systematic review of the literature]. Cien Saude Colet. 2016;21(2):443-8.

19. Finegan M, Firth N, Wojnarowski C, Delgadillo J. Associations between socioeconomic status and psychological therapy outcomes: A systematic review and meta-analysis. Depression and anxiety. 2018;35(6):560-73.

20. Hoven H, Siegrist J, Goldberg M, Ribet C, Zins M, Wahrendorf M. Intragenerational social mobility and depressive symptoms. Results from the French CONSTANCES cohort study. SSM - Population Health. 2019;7:100351.

21. The Canadian Agency for Drugs and Technologies in Health (CADTH). Strings Attached: CADTH’s Database Search FIlters 2018 [Available from: <https://www.cadth.ca/resources/finding-evidence/strings-attached-cadths-database-search-filters#guide>.

22. Cooper C, Varley-Campbell J, Carter P. Established search filters may miss studies when identifying randomised controlled trials. Journal of Clinical Epidemiology. 2019;112(August):12-9.

23. Healthcare Improvement Scotland: SIGN. Search Filters Edinburgh: Healthcare Improvement Scotland: SIGN; 2019 [cited 2019 Jul 19]. Available from: <https://www.sign.ac.uk/search-filters.html>.
