# Supplementary material for: The association between common mental disorders, socioeconomic outcomes and social mobility: A systematic review
Source: Research Square preprint supplement (doi:10.21203/rs.3.rs-2656092/v1), 2024-01-11
Supplement: Supplementary file 3 [file bc17046c70fba33525c6a1e7.docx]

*The association between common mental disorders, socioeconomic outcomes and social mobility: A systematic review*

*Social Psychiatry and Psychiatric Epidemiology*

*Iyinoluwa Oshinowo, Phoebe Barnett, Christopher Cooper, Shubulade Smith2, Clare Taylor, Stephen Pilling,*

*Corresponding author:*

*Iyinoluwa Oshinowo*

[*i.oshinowo@ucl.ac.uk*](mailto:i.oshinowo@ucl.ac.uk)

*Centre for Outcomes Research and Effectiveness, Research Department of Clinical, Educational and Health Psychology, University College London, London, UK*

**Online resource 3: Exclusion Table**

| **Study ID** | **Reason for exclusion** |
| --- | --- |
| Agerbo 2015 | Does not report target outcomes: Investigates social mobility's impact on mental health*  Investigates how different factors (Parental socioeconomic status, and family history of psychiatric disorders) increase the risk of Schizophrenia |
| Aitken 2016 | Does not report target outcomes* |
| Assari 2018  Bennett 2020 | Does not report target outcomes: Investigates outcomes of self-esteem  Does not report on target outcomes |
| Cao 2015 | Does not report target outcomes |
| Chandolaa 2003 | Does not report target population |
| De Quadros 2015 | Does not report target outcomes* |
| De Raevea 2009  Dodgeon 2020 | Does not report target outcomes  Population |
| Eichenberger 1998  Evans 2020 | Incorrect study design  Incorrect study design |
| Folb 2015 | Not all of the included population have a mental health disease |
| Fox 1990 | Incorrect study design: Reanalysis of previously collected data |
| Franz 2000  Frech 2019 | Does not report target outcomes*  Social mobility's impact on mental health |
| Green 2013  Greene 2020 | Does not report target outcomes*  Social mobility's impact on mental health |
| Greve 2007 | Does not report target outcomes: Investigates effects on intelligence |
| Hair 2002  Hanley 2020 | Does not report target outcomes: Literacy and Depression as the outcome  Social mobility's impact on mental health |
| Houtepen 2018 | Conference abstract |
| Howard 2014 | Does not report target outcomes: Career satisfaction outcomes |
| Iversen 2007 | Incorrect study design: Ethnography |
| Jacobs 1972 | No comparison, only looks at lower social classes |
| Jani 2012 | Does not report target outcomes : GP consultation characteristics |
| Karriker-Jaffe 2018 | Incorrect study population |
| Kiely 2014 | Social mobility's impact on mental health: Outcomes of income support |
| Kuh 1990 | Does not report target outcomes:  Mental health outcomes predicting parental divorce only. |
| Kwon 2018 | Social mobility's impact on mental health |
| Lee 1976 | Incorrect study design: Case control |
| Lee 2013 | Does not report target outcomes* |
| Lix 2006 | Does not report target outcomes |
| Lix 2007 | Does not report target outcomes |
| Matthews 2001 | Does not report target outcomes* |
| Matthews 1999  Matsumura 2019 | Does not report target outcomes*  Social mobility's impact on mental health |
| McEachan 2016  Meng 2020 | SES not an outcomes, not target intervention  Social mobility's impact on mental health |
| Miles 2011  Minh 2021 | Incorrect study design  Social mobility's impact on mental health |
| Muschalla 2018 | Not social mobility outcomes |
| Mwinyi 2017  Oliver-Parra 2020 | Wrong study measures  Social mobility's impact on mental health |
| Omrin 2016 | Conference abstract |
| Osypuk 2012 | Outcomes not reported by social class |
| Strassnig 2017 | Does not look at how mental health directly affects employment & Wrong population |
| Tanaka 2018 | Does not report target outcomes* |
| Thielen 2014 | Does not report target outcomes |
| Timms 1996 | Does not report target outcomes* |
| Timms 1998 | Does not report target outcomes* |
| Van der Lem 2013 | Does not report target outcomes: Peer review of RCTs |
| Van Oort 2007 | Wrong target population: Problem behaviour |
| Wheaton 1978 | Incorrect study design: Secondary theoretical analysis |
| Wickrama 2009 | Does not report target outcomes* |
| Kottgen 1980 | Does not report target outcomes* |
| Murphy 1991 | Does not report target outcomes |
| Norman 2014 | Conference abstract |
| P0tter 2012 | Thesis |
| Ranning 2016 | Conference abstract |
| Rickels 1970 | Does not report target outcomes |
| Bouvette-Turcot 2017 | Incorrect study design: Outcomes were cross sectional |
| Abood 2002 | Incorrect study design: Outcomes were cross sectional |
